# Supplementary material for: Genetic Predictions of Prion Disease Susceptibility in Carnivore Species Based on Variability of the Prion Gene Coding Region
Source: PubMed Central journal article supplement (PMC3517517; doi:10.1371/journal.pone.0050623), 2012-12-07

|              |                                                                                 |     |
|--------------|---------------------------------------------------------------------------------|-----|
| Panthera L1  | MVKGHIGGWILVLFVATWSDVGLCKRKPGGGWNTGG.SRYPGQGSPPGNRYPPQGGGGWGQPHAGGGWGQPHAGGGWGQ | 080 |
| Catopuma L2  | -----                                                                           | 080 |
| Leopardus L4 | -----                                                                           | 080 |
| Puma L6      | -----                                                                           | 080 |
| Felis L8     | -----                                                                           | 080 |
| Binturong    | --S-----                                                                        | 078 |
| Hyena        | --S-----                                                                        | 078 |
| Canis        | --S-----L-----G-----                                                            | 078 |
| Vulpes       | --S-----L-----G-----                                                            | 078 |
| Speothos     | --S-----L-----G-----                                                            | 078 |
| Chrysocyon   | --S-----L-----G-----                                                            | 078 |
| Ursus        | --S-----                                                                        | 078 |
| Phoca        | --S-----A-----                                                                  | 078 |
| Cystophora   | --S-█-----                                                                      | 078 |
| Pagophilus   | --S-----A-----                                                                  | 078 |
| Otaria       | --S-V-S-----G-----                                                              | 079 |
| Gulo         | --S-S-L-----I-F-----█-----                                                      | 078 |
| Martes       | --S-S-L-----F-----                                                              | 078 |
| Meles        | --S-S-L-----F-----                                                              | 078 |
| Mustela      | --S-S-L-----I-F-----                                                            | 078 |
| Lutra        | --S-S-L-----I-F-----                                                            | 078 |
| Mephitis     | --GS-----I-----S-----                                                           | 078 |
| Homo sapiens | --..ANL-C-M-----L-----                                                          | 075 |
| Bos          | --S-S-----M-----                                                                | 078 |
| Ovis         | --S-S-----M-----                                                                | 078 |
| Cervus       | --S-S-----M-----                                                                | 078 |
| Mus          | --..ANL-Y-L-A-----TM-T-----T-----S-----                                         | 074 |
| Oryctolagus  | --..A-L-Y-M-L-----S-----█-----                                                  | 075 |
| Equus        | --S-V-----                                                                      | 077 |
| Sus          | --S-----A-I-----                                                                | 078 |

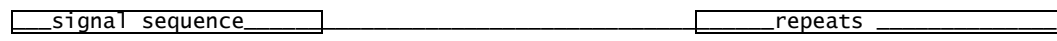

|              |                                                                                 |     |
|--------------|---------------------------------------------------------------------------------|-----|
| Panthera L1  | PHAGGGWGQ.....PHAGGGWGQGGGTHSQWGKPSKPKTNMKHMAGAAAAGAVVGGGLGGYMLGSAMNRPLIHFGNDYE | 153 |
| Catopuma L2  | -----S-----                                                                     | 153 |
| Leopardus L4 | -----N-----S-----                                                               | 153 |
| Puma L6      | -----S-----                                                                     | 144 |
| Felis L8     | █-----G-----S-----                                                              | 153 |
| Binturong    | -----G-----V-----                                                               | 150 |
| Hyena        | -----G-----S-----                                                               | 150 |
| Canis        | -----G-S-█-----N-----V-----S-----                                               | 150 |
| Vulpes       | -----G-S-█-----N-----V-----S-----                                               | 150 |
| Speothos     | -----G-S-----N-----V-----S-----                                                 | 150 |
| Chrysocyon   | -----G-S-----N-----V-----S-----                                                 | 150 |
| Ursus        | █-----G-G-----V-----S-----                                                      | 150 |
| Phoca        | -----G-G-----N-----S-----                                                       | 150 |
| Cystophora   | PHGGGWGQ-----G-G-----N-----S-----                                               | 150 |
| Pagophilus   | -----G-G-----N-----S-----                                                       | 150 |
| Otaria       | -G-----G-S-G-----N-----S-----                                                   | 152 |
| Gulo         | -----G-S-G-----V-----S-----                                                     | 150 |
| Martes       | -----G-S-G-----V-----S-----                                                     | 150 |
| Meles        | -----G-S-G-----V-----S-----                                                     | 150 |
| Mustela      | -----G-S-G-----I-V-----S-----                                                   | 150 |
| Lutra        | -----G-S-G-----V-----S-----                                                     | 150 |
| Mephitis     | -----G-S-G-----I-----S-----                                                     | 150 |
| Homo sapiens | -----P-----N-----S-I-S-----                                                     | 146 |
| Bos          | PHGGGWGQ-----G-N-----V-----S-----S-----                                         | 157 |
| Ovis         | -----G-S-N-----█-----█-----S-█-----                                             | 149 |
| Cervus       | -----G-█-----N-----V-----S-----                                                 | 149 |
| Mus          | --S-----N-N-----█-----V-S-M-----W-----                                          | 145 |
| Oryctolagus  | -----█-----N-----S-----V-----                                                   | 146 |
| Equus        | -----S-G-N-----V-----S-----                                                     | 148 |
| Sus          | -----S-G-N-----V-----S-----S-----                                               | 150 |

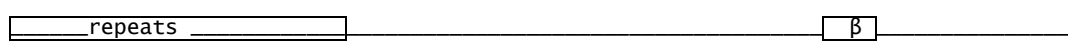

|              |    |          |          |          |        |        |         |        |           |         |         |        |            |          |     |
|--------------|----|----------|----------|----------|--------|--------|---------|--------|-----------|---------|---------|--------|------------|----------|-----|
| Panthera     | L1 | DRYYRE   | MYRPNQ   | VYVYRP   | VDQYSN | QNQNFV | HDCVNIT | VRQHTV | TTTTTK    | GENFTET | DMKIMER | VVEQMC | VTVQYQK    | ESEAYY   | 233 |
| Catopuma     | L2 | -----    | -----    | -----    | -----  | -----  | -----   | -----  | -----     | -----   | -----   | -----  | -----      | -----    | 233 |
| Leopardus    | L4 | -----    | -----    | -----    | S----- | -----  | -----   | -----  | -----     | -----   | -----   | -----  | -----      | -----    | 234 |
| Puma         | L6 | -----    | -----    | -----    | -----  | -----  | -----   | -----  | -----     | -----   | -----   | -----  | -----      | -----    | 224 |
| Felis        | L8 | -----    | -----    | -----    | -----  | -----  | -----   | -----  | -----     | -----   | -----   | -----  | -----      | -----    | 233 |
| Binturong    |    | -----    | -----    | -----    | -----  | -----  | -----   | K----- | -----     | -----   | MI----- | -----  | -----      | R-----   | 230 |
| Hyena        |    | Q-D----- | -----    | K-----   | S----- | -----  | -----   | -----  | -----     | -----   | -----   | -----  | -----      | R-----   | 230 |
| Canis        |    | -----    | D-----   | -----    | -----  | R----- | K-----  | -----  | -----     | -----   | -----   | -----  | -----      | -----    | 230 |
| Vulpes       |    | -----    | D-----   | -----    | -----  | R----- | K-----  | -----  | -----     | -----   | -----   | -----  | -----      | -----    | 230 |
| Speothos     |    | -----    | D-----   | -----    | -----  | R----- | K-----  | -----  | -----     | -----   | -----   | -----  | -----      | -----    | 230 |
| Chrysocyon   |    | -----    | D-----   | -----    | -----  | R----- | K-----  | -----  | -----     | -----   | -----   | -----  | -----      | -----    | 230 |
| Ursus        |    | -----    | -----    | K-----   | S----- | -----  | K-----  | -----  | -----     | I-----  | -----   | -----  | -----      | R-A----- | 230 |
| Phoca        |    | -----    | -----    | K-----   | S----- | -----  | K-----  | -----  | -----     | -----   | -----   | -----  | -----      | -----    | 230 |
| Cystophora   |    | -----    | -----    | K-----   | S----- | -----  | K-----  | -----  | -----     | -----   | -----   | -----  | -----      | -----    | 230 |
| Pagophilus   |    | -----    | -----    | K-----   | S----- | -----  | K-----  | -----  | -----     | -----   | -----   | -----  | -----      | -----    | 230 |
| Otaria       |    | -----    | N-----   | K-----   | -----  | -----  | K-----  | -----  | -----     | -----   | -----   | -----  | -----      | R-----   | 232 |
| Gulo         |    | -----    | H-D----- | K-----   | S----- | -----  | K-----  | -----  | -----     | -----   | -----   | -----  | -----      | R-----   | 230 |
| Martes       |    | -----    | H-D----- | K-----   | -----  | -----  | K-----  | -----  | -----     | -----   | -----   | -----  | -----      | R-----   | 230 |
| Meles        |    | -----    | -----    | K-----   | -----  | -----  | K-----  | -----  | -----     | -----   | -----   | -----  | -----      | R-----   | 230 |
| Mustela      |    | -----    | -----    | K-----   | -----  | -----  | K-----  | -----  | -----     | -----   | -----   | -----  | -----      | R-----   | 230 |
| Lutra        |    | -----    | -----    | K-----   | -----  | -----  | K-----  | -----  | -----     | -----   | -----   | -----  | -----      | R-----   | 230 |
| Mephitis     |    | -----    | D-----   | -----    | K----- | -----  | -----   | -----  | -----     | -----   | -----   | -----  | -----      | R-----   | 230 |
| Homo sapiens |    | -----    | H-----   | M-E----- | -----  | -----  | IK----- | -----  | V-M-----  | I-----  | -----   | -----  | -----      | R-Q----- | 226 |
| Bos          |    | -----    | H-----   | -----    | -----  | -----  | KE----- | -----  | I-M-----  | I-----  | -----   | -----  | -----      | R-Q----- | 237 |
| Ovis         |    | -----    | -----    | -----    | -----  | -----  | K-----  | -----  | I-----    | I-----  | -----   | -----  | -----      | R-Q----- | 229 |
| Cervus       |    | -----    | -----    | -----    | N----- | T----- | K-----  | -----  | I-M-----  | I-----  | -----   | -----  | -----      | R-----   | 229 |
| Mus          |    | -----    | -----    | -----    | -----  | -----  | IK----- | -----  | V-M-----  | -----   | -----   | -----  | -----      | Q-----   | 225 |
| Oryctolagus  |    | -----    | -----    | -----    | S----- | -----  | K-----  | -----  | I-----    | I-----  | -----   | -----  | Q-Q-A----- | -----    | 226 |
| Equus        |    | -----    | -----    | SE-----  | -----  | -----  | K-----  | -----  | V-----    | I-----  | -----   | -----  | Y-FQ-----  | -----    | 228 |
| Sus          |    | -----    | -----    | -----    | S----- | -----  | K-----  | -----  | V-MI----- | I-----  | -----   | -----  | Y-A-----   | -----    | 230 |

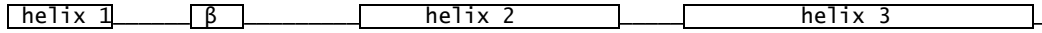

|              |    |                   |                          |        |                |        |        |       |
|--------------|----|-------------------|--------------------------|--------|----------------|--------|--------|-------|
| Panthera     | L1 | Q.RGAS            | .A                       | ILFSP  | PPVILL         | LSLL   | ILLIGG | # 260 |
| Catopuma     | L2 | -----             | -----                    | -----  | -----          | -----  | -----  | # 260 |
| Leopardus    | L4 | -----             | -----                    | -----  | -----          | -----  | -----  | # 261 |
| Puma         | L6 | -----             | -----                    | -----  | -----          | -----  | -----  | # 251 |
| Felis        | L8 | -----             | -----                    | -----  | -----          | -----  | -----  | # 260 |
| Binturong    |    | -----             | -----                    | -----  | I-----         | -----  | -----  | ----- |
| Hyena        |    | -----             | VV-L-----                | V----- | V-----         | V----- | V----- | #     |
| Canis        |    | -----             | -----                    | -----  | I-----         | -----  | V----- | # 257 |
| Vulpes       |    | -----             | -----                    | -----  | -----          | -----  | -----  | ----- |
| Speothos     |    | -----             | -----                    | M----- | I-----         | -----  | V----- | # 257 |
| Chrysocyon   |    | -----             | -----                    | -----  | I-----         | -----  | V----- | # 257 |
| Ursus        |    | -----             | -----                    | -----  | I-----         | -----  | V----- | # 257 |
| Phoca        |    | -----             | -----                    | -----  | I-----         | -----  | V----- | # 257 |
| Cystophora   |    | -----             | -----                    | -----  | I-----         | -----  | V----- | # 257 |
| Pagophilus   |    | -----             | -----                    | -----  | I-----         | -----  | V----- | # 257 |
| Otaria       |    | -----             | -----                    | -----  | I-----         | -----  | V----- | # 259 |
| Gulo         |    | -----             | -V-----                  | I----- | V-----         | V----- | V----- | # 257 |
| Martes       |    | -----             | -V-----                  | -----  | -----          | -----  | -----  | ----- |
| Meles        |    | -----             | -----                    | -----  | -----          | -----  | -----  | ----- |
| Mustela      |    | -----             | -----                    | -----  | -----          | -----  | -----  | ----- |
| Lutra        |    | -----             | -----                    | -----  | -----          | -----  | -----  | ----- |
| Mephitis     |    | -----             | -M-----                  | -----  | I-----         | -----  | L----- | # 257 |
| Homo sapiens |    | -----             | S-MV-----                | S----- | I-F--F--V----- | -----  | -----  | # 253 |
| Bos          |    | -----             | V-----                   | S----- | I-F--F--V----- | -----  | -----  | # 264 |
| Ovis         |    | -----             | V-----                   | S----- | I-F--F--V----- | -----  | -----  | # 256 |
| Cervus       |    | -----             | V-----                   | S----- | I-F--F--V----- | -----  | -----  | # 256 |
| Mus          |    | DG-RS-STV--S----- | -----                    | -----  | I-F--F--V----- | -----  | -----  | # 254 |
| Oryctolagus  |    | -A-G.VL--S-----   | -----                    | -----  | I-F--F--V----- | -----  | -----  | # 253 |
| Equus        |    | -----             | VV--S--V--I-F--F--V----- | -----  | -----          | -----  | -----  | # 255 |
| Sus          |    | -----             | V--S--S--I-F-LF--V-----  | -----  | -----          | -----  | -----  | # 257 |

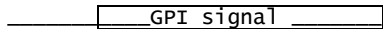

Supplement: pone.0050623.s001.pdf [file pone.0050623.s001.pdf]
